# Supplementary material for: Thymol and carvacrol derivatives as anticancer agents; synthesis, in vitro activity, and computational analysis of biological targets
Source: Royal Society of Chemistry journal article supplement (doi:10.1039/d4ra03941f), 2024-01-01
Supplement: d4ra03941f1.pdf [file d4ra03941f1.pdf]

## Thymol and Carvacrol Derivatives as Anticancer Agents; Synthesis, In-Vitro Activity, and Computational Analysis of Biological Targets

### Supplementary data

#### Table of contents:

|                    |                                                                                             |
|--------------------|---------------------------------------------------------------------------------------------|
| <b>Figure S1.</b>  | <sup>1</sup> H-NMR spectrum of 1-isopropyl-2-(2-methoxy-ethoxy)-4-methyl-benzene (TE)       |
| <b>Figure S2.</b>  | <sup>13</sup> C-NMR spectrum of 1-isopropyl-2-(2-methoxy-ethoxy)-4-methyl-benzene (TE)      |
| <b>Figure S3.</b>  | GCMS analysis of 1-isopropyl-2-(2-methoxy-ethoxy)-4-methyl-benzene (TE)                     |
| <b>Figure S4.</b>  | <sup>1</sup> H-NMR spectrum of 4-isopropyl-2-(2-methoxy-ethoxy)-1-methyl-benzene (CE)       |
| <b>Figure S5.</b>  | <sup>13</sup> C-NMR spectrum of 4-isopropyl-2-(2-methoxy-ethoxy)-1-methyl-benzene (CE)      |
| <b>Figure S6.</b>  | GCMS analysis of 4-isopropyl-2-(2-methoxy-ethoxy)-1-methyl-benzene (CE)                     |
| <b>Figure S7.</b>  | <sup>1</sup> H-NMR spectrum of 2-(2-cyclohexyl-ethoxy)-1-isopropyl-4-methyl-benzene (TH)    |
| <b>Figure S8.</b>  | <sup>13</sup> C-NMR spectrum of 2-(2-cyclohexyl-ethoxy)-1-isopropyl-4-methyl-benzene (TH)   |
| <b>Figure S9.</b>  | GCMS analysis of 2-(2-cyclohexyl-ethoxy)-1-isopropyl-4-methyl-benzene (TH)                  |
| <b>Figure S10.</b> | <sup>1</sup> H-NMR spectrum of 2-(2-cyclohexyl-ethoxy)-4-isopropyl-1-methyl-benzene (CH)    |
| <b>Figure S11.</b> | <sup>13</sup> C-NMR spectrum of 2-(2-cyclohexyl-ethoxy)-4-isopropyl-1-methyl-benzene (CH)   |
| <b>Figure S12.</b> | GCMS analysis of 2-(2-cyclohexyl-ethoxy)-4-isopropyl-1-methyl-benzene (CH)                  |
| <b>Figure S13.</b> | <sup>1</sup> H-NMR spectrum of acetic acid 2-isopropyl-5-methyl-phenyl ester (TA)           |
| <b>Figure S14.</b> | <sup>13</sup> C-NMR spectrum of acetic acid 2-isopropyl-5-methyl-phenyl ester (TA)          |
| <b>Figure S15.</b> | GCMS analysis of acetic acid 2-isopropyl-5-methyl-phenyl ester (TA)                         |
| <b>Figure S16.</b> | <sup>1</sup> H-NMR spectrum of acetic acid 5-isopropyl-2-methyl-phenyl ester (CA)           |
| <b>Figure S17.</b> | <sup>13</sup> C-NMR spectrum of acetic acid 5-isopropyl-2-methyl-phenyl ester (CA)          |
| <b>Figure S18.</b> | GCMS analysis of acetic acid 5-isopropyl-2-methyl-phenyl ester (CA)                         |
| <b>Figure S19.</b> | <sup>1</sup> H-NMR spectrum of 4-nitro-benzoic acid 2-isopropyl-5-methyl-phenyl ester (TN)  |
| <b>Figure S20.</b> | <sup>13</sup> C-NMR spectrum of 4-nitro-benzoic acid 2-isopropyl-5-methyl-phenyl ester (TN) |
| <b>Figure S21.</b> | GCMS analysis of 4-nitro-benzoic acid 2-isopropyl-5-methyl-phenyl ester (TN)                |
| <b>Figure S22.</b> | HPLC analysis of 4-nitro-benzoic acid 2-isopropyl-5-methyl-phenyl ester (TN)                |
| <b>Figure S23.</b> | <sup>1</sup> H-NMR spectrum of 4-nitro-benzoic acid 5-isopropyl-2-methyl-phenyl ester (CN)  |
| <b>Figure S24.</b> | <sup>13</sup> C-NMR spectrum of 4-nitro-benzoic acid 5-isopropyl-2-methyl-phenyl ester (CN) |
| <b>Figure S25.</b> | GCMS analysis of 4-nitro-benzoic acid 5-isopropyl-2-methyl-phenyl ester (CN)                |
| <b>Figure S26.</b> | HPLC analysis of 4-nitro-benzoic acid 5-isopropyl-2-methyl-phenyl ester (CN)                |
| <b>Figure S27.</b> | In vitro anticancer activity at 10 μM.                                                      |
| <b>Table S1.</b>   | Gene targets of the test compounds.                                                         |

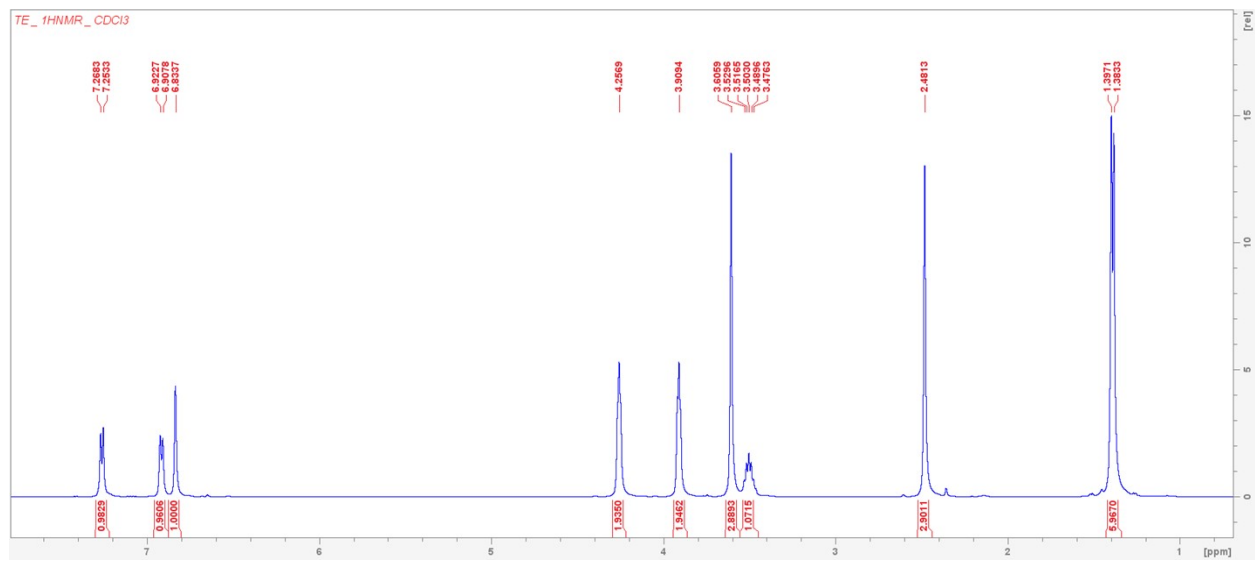

**Figure S1.**  $^1\text{H-NMR}$  spectrum of 2-isopropyl-1-(2-methoxy-ethoxy)-5-methyl-benzene (TE) in  $\text{CDCl}_3$ .

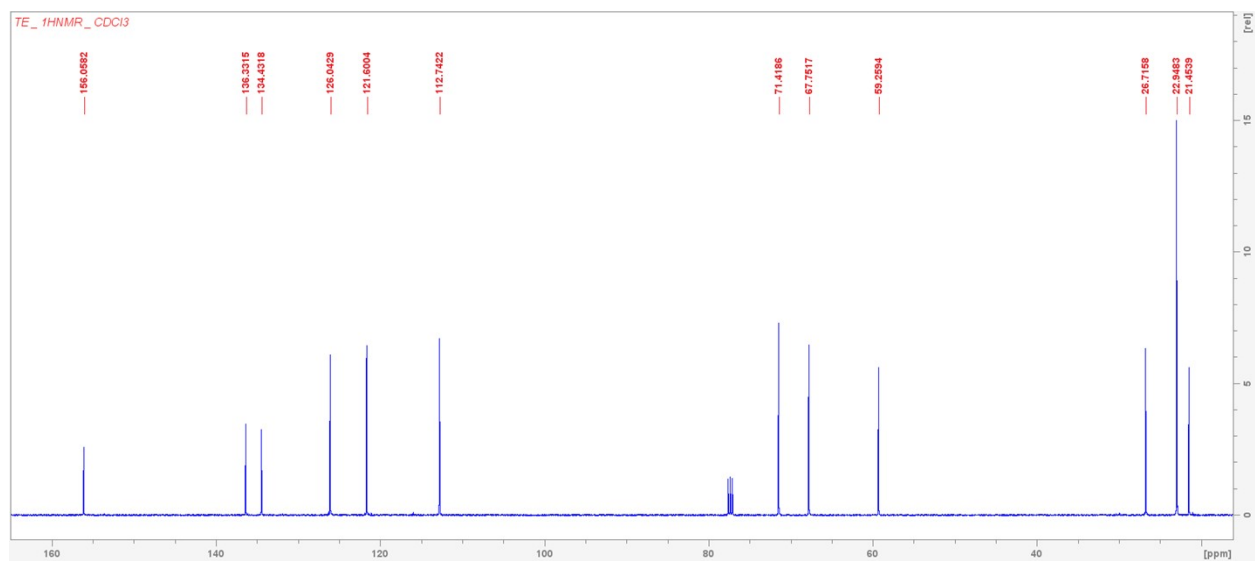

**Figure S2.**  $^{13}\text{C}$ -NMR spectrum of 2-isopropyl-1-(2-methoxy-ethoxy)-5-methyl-benzene (TE) in  $\text{CDCl}_3$ .

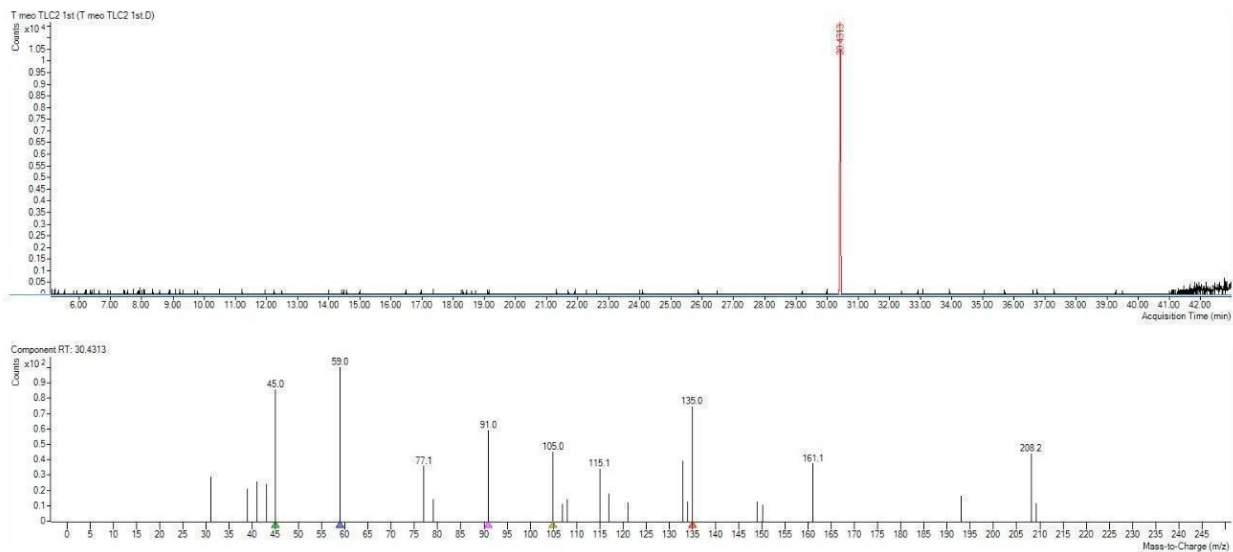

**Figure S3.** GCMS analysis of 2-isopropyl-1-(2-methoxy-ethoxy)-5-methyl-benzene (TE).

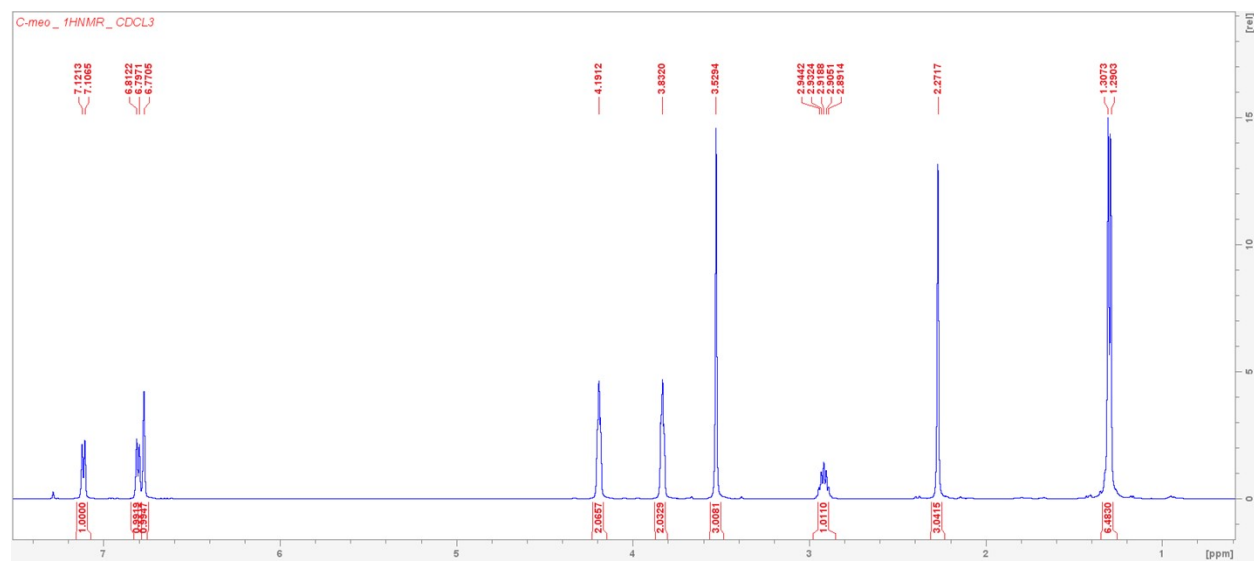

**Figure S4.** <sup>1</sup>H-NMR spectrum of 3-isopropyl-1-(2-methoxy-ethoxy)-6-methyl-benzene (CE) in CDCl<sub>3</sub>.

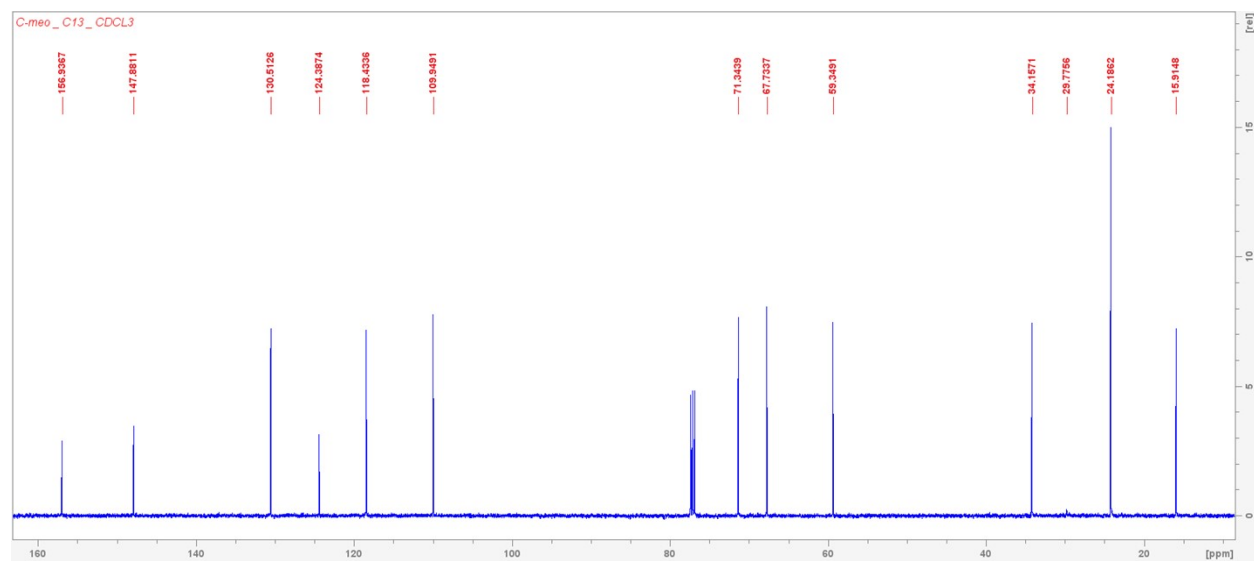

**Figure S5.** <sup>13</sup>C-NMR spectrum of 3-isopropyl-1-(2-methoxy-ethoxy)-6-methyl-benzene (CE) in CDCl<sub>3</sub>.

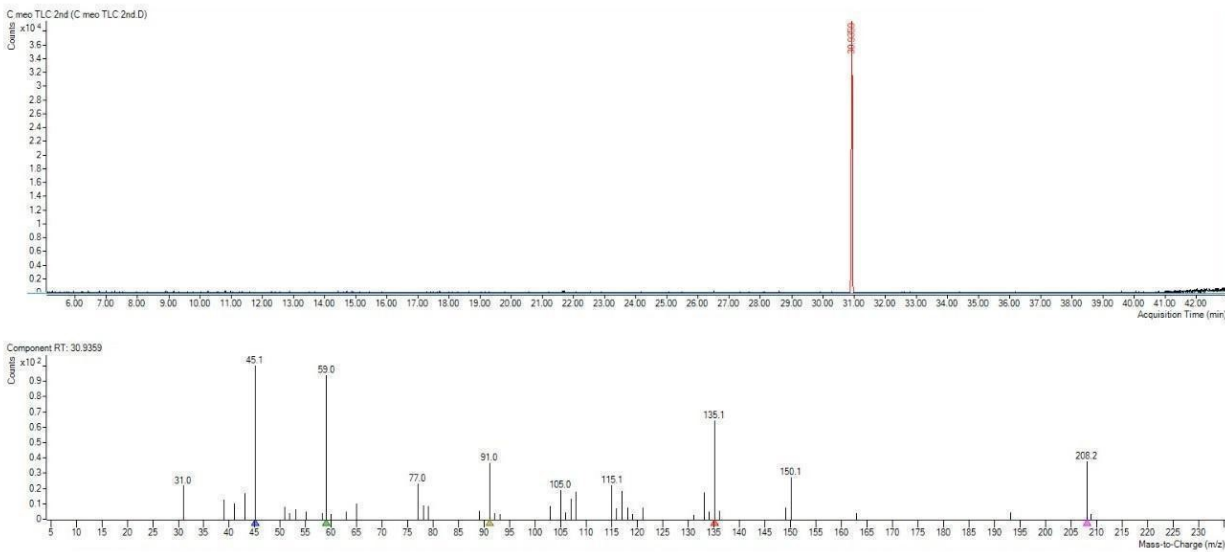

**Figure S6.** GCMS analysis of 3-isopropyl-1-(2-methoxy-ethoxy)-6-methyl-benzene (CE).

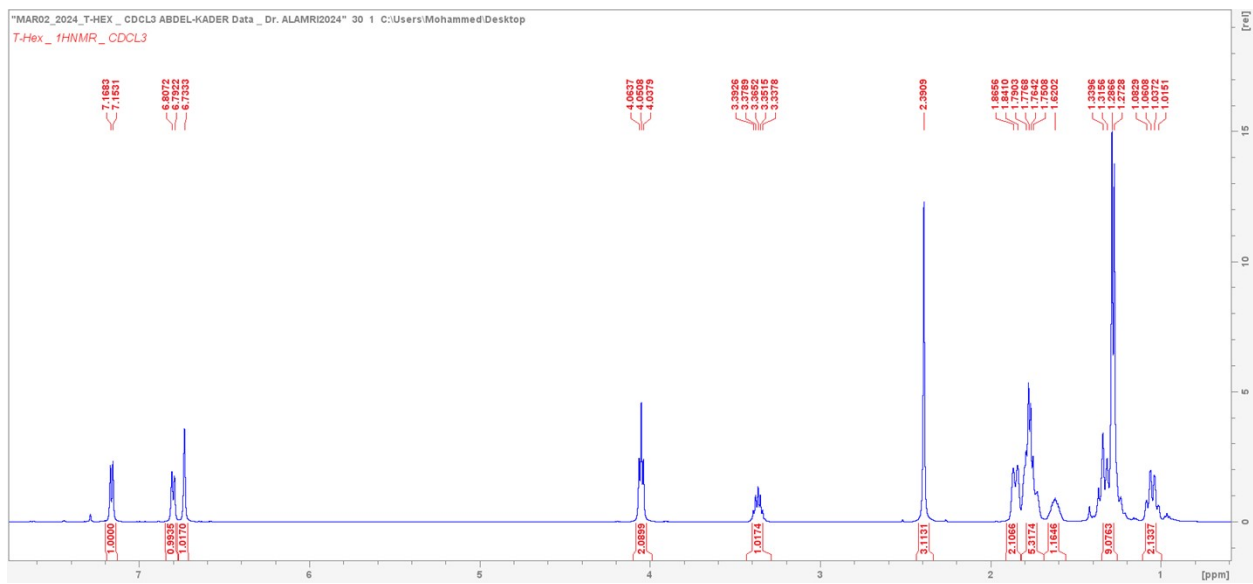

**Figure S7.** <sup>1</sup>H-NMR spectrum of 1-(2-cyclohexyl-ethoxy)-2-isopropyl-5-methyl-benzene (TH) in CDCl<sub>3</sub>.



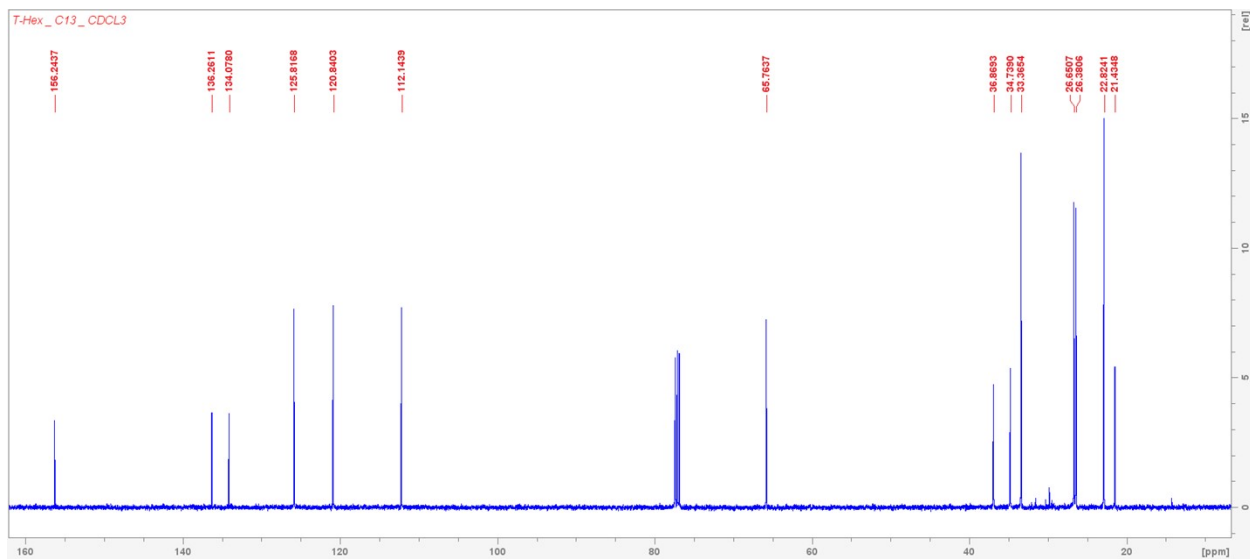

**Figure S8.** <sup>13</sup>C-NMR spectrum of 1-(2-cyclohexyl-ethoxy)-2-isopropyl-5-methyl-benzene (TH) in CDCl<sub>3</sub>.

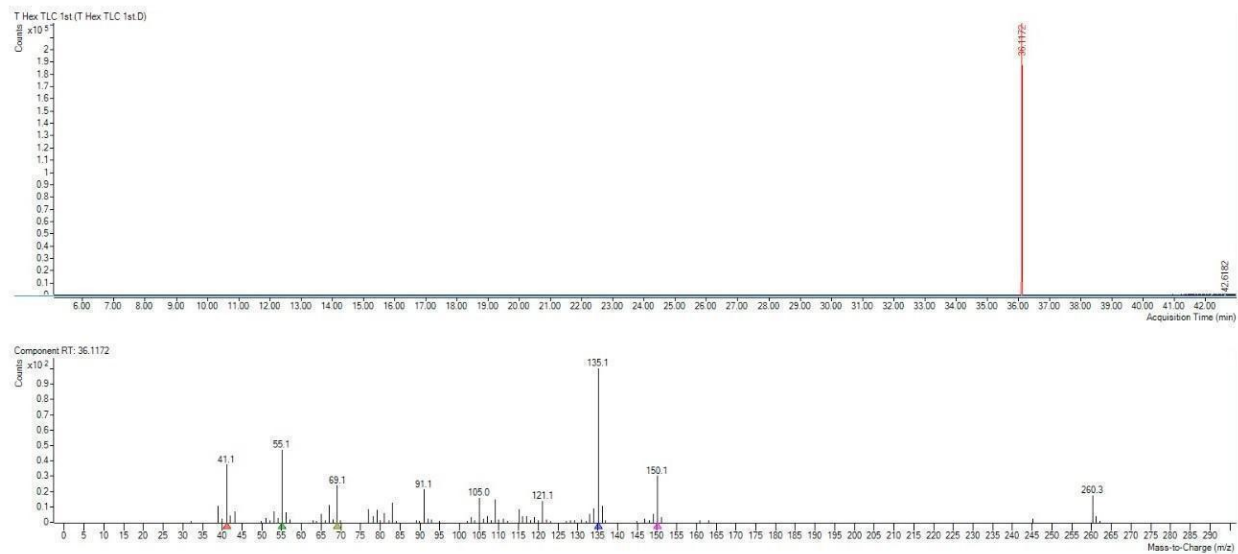

**Figure S9.** GCMS analysis of 1-(2-cyclohexyl-ethoxy)-2-isopropyl-5-methyl-benzene (TH).

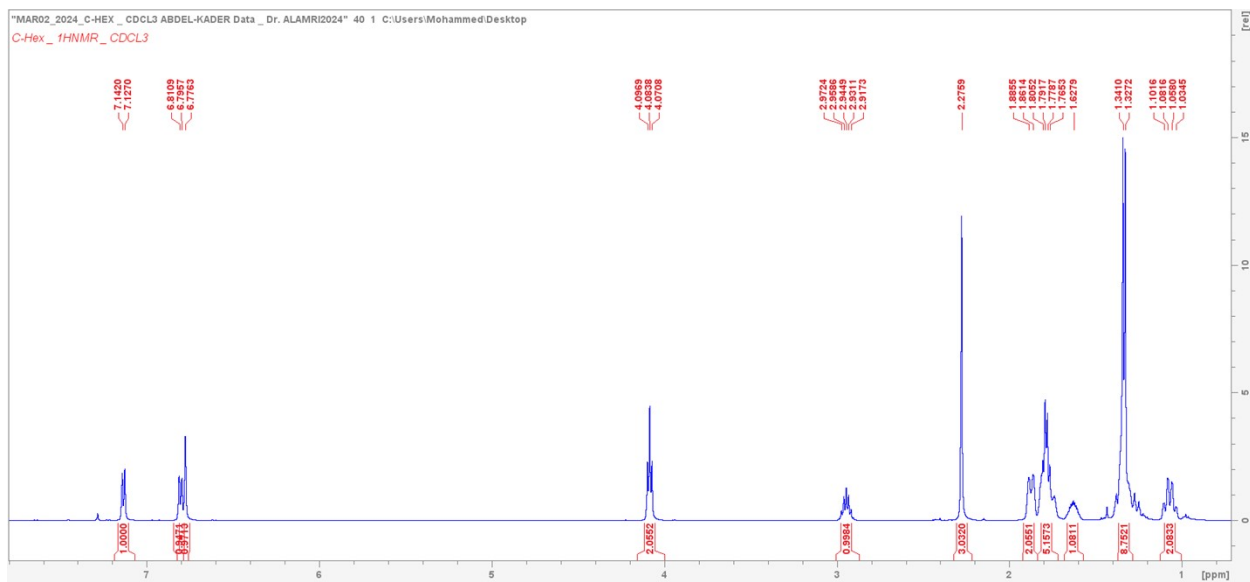

**Figure S10.**  $^1\text{H-NMR}$  spectrum of 1-(2-cyclohexyl-ethoxy)-3-isopropyl-6-methyl-benzene (CH) in  $\text{CDCl}_3$ .

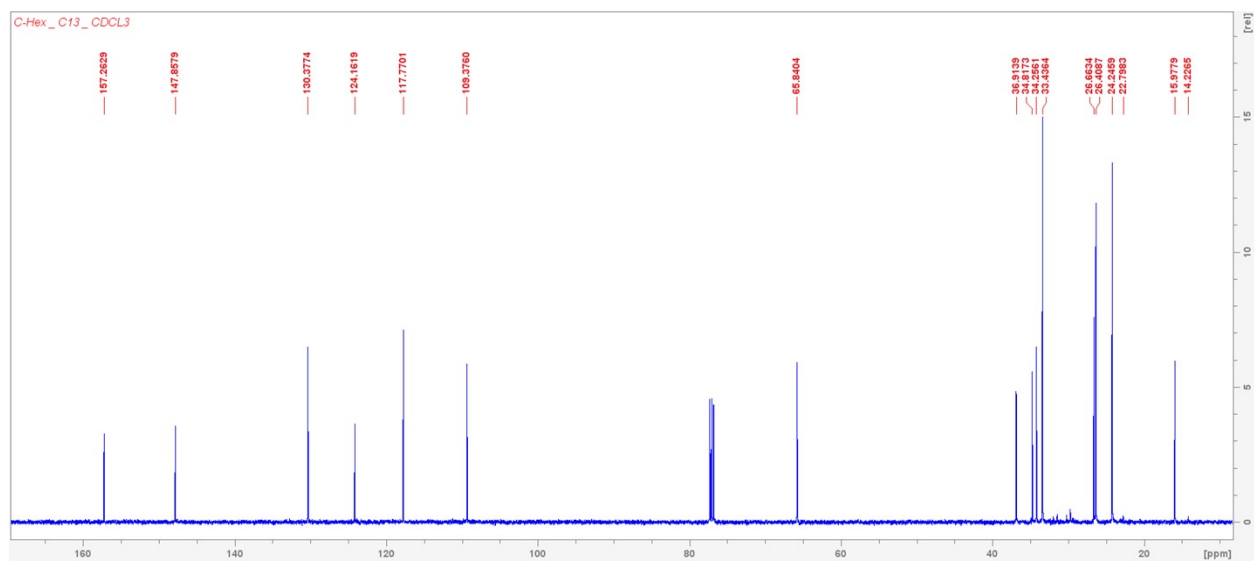

**Figure S11.** <sup>13</sup>C-NMR spectrum of 1-(2-cyclohexyl-ethoxy)-3-isopropyl-6-methyl-benzene (CH) in CDCl<sub>3</sub>.

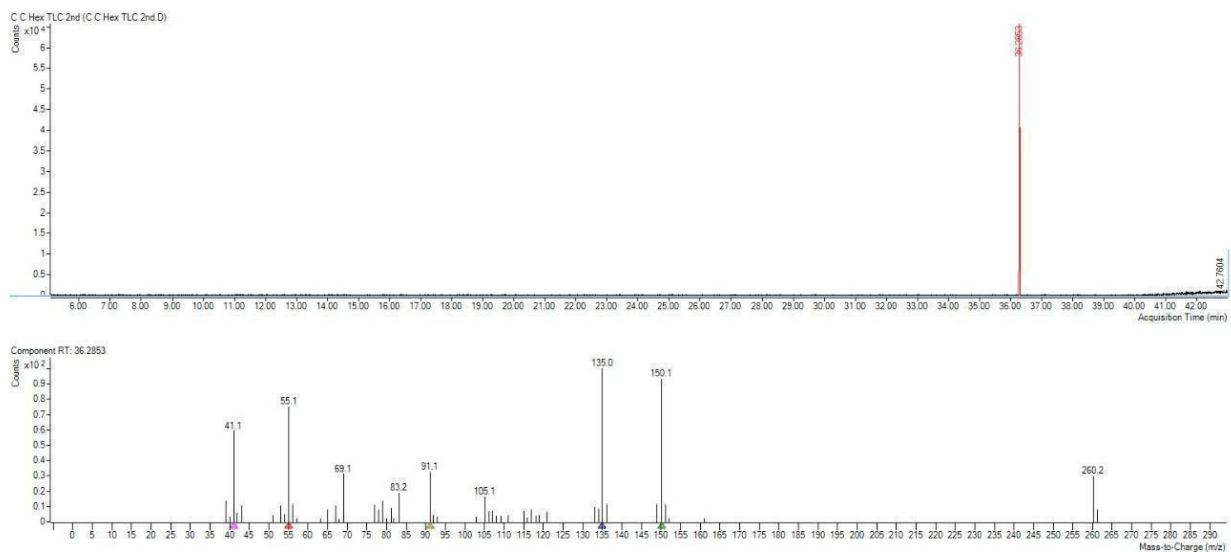

**Figure S12.** GCMS analysis of 1-(2-cyclohexyl-ethoxy)-3-isopropyl-6-methyl-benzene (CH).

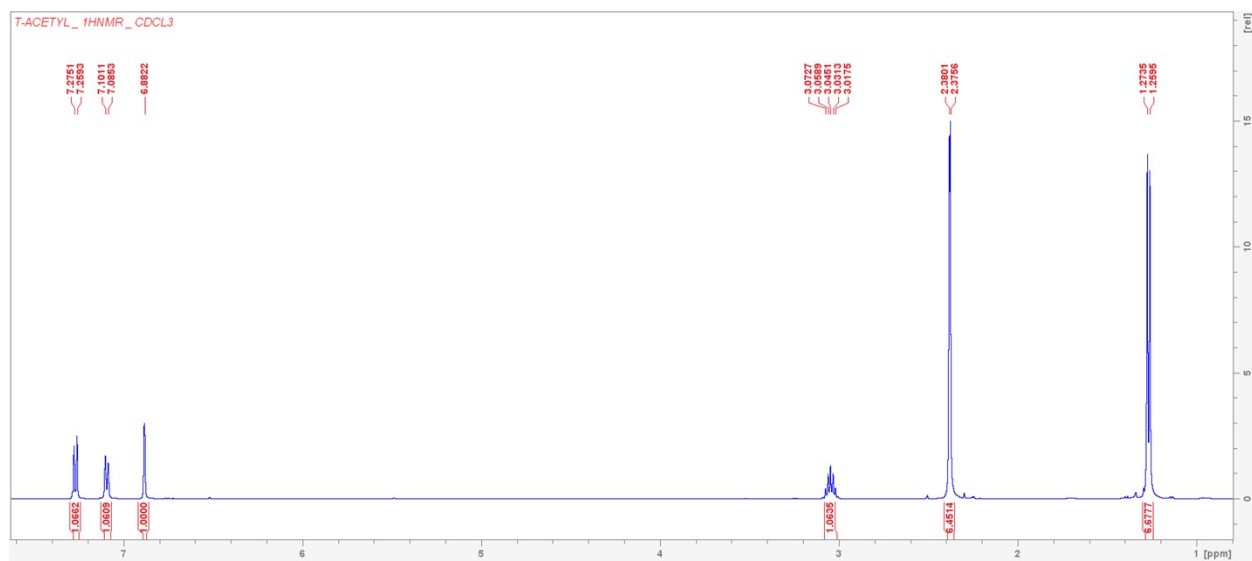

**Figure S13.** <sup>1</sup>H-NMR spectrum of acetic acid 2-isopropyl-5-methyl-phenyl ester (TA) in CDCl<sub>3</sub>.

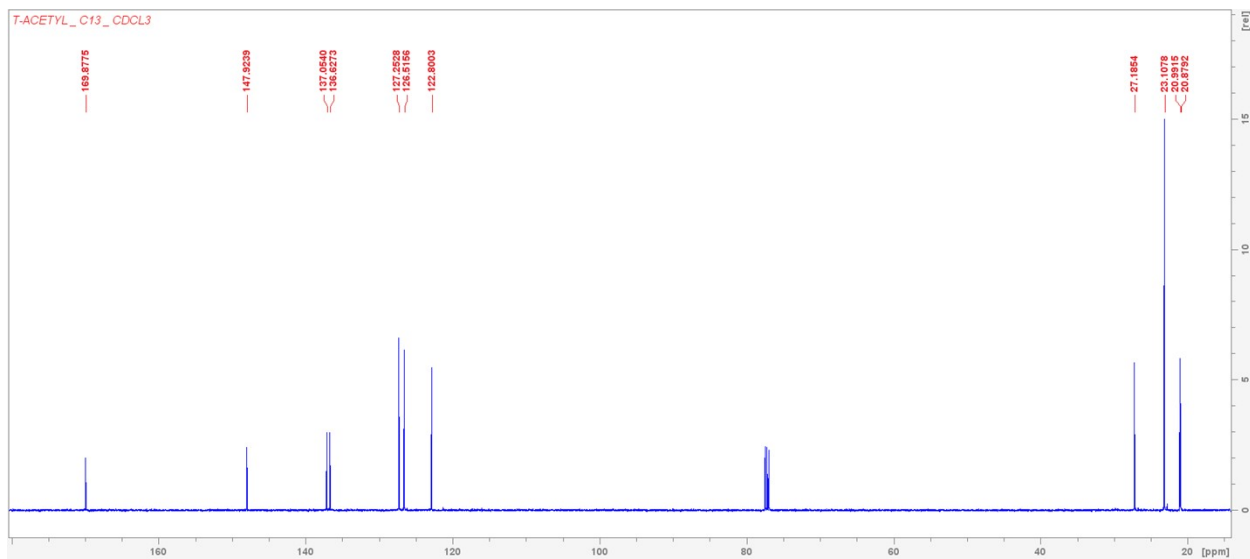

**Figure S14.**  $^{13}\text{C}$ -NMR spectrum of acetic acid 2-isopropyl-5-methyl-phenyl ester (TA) in  $\text{CDCl}_3$ .

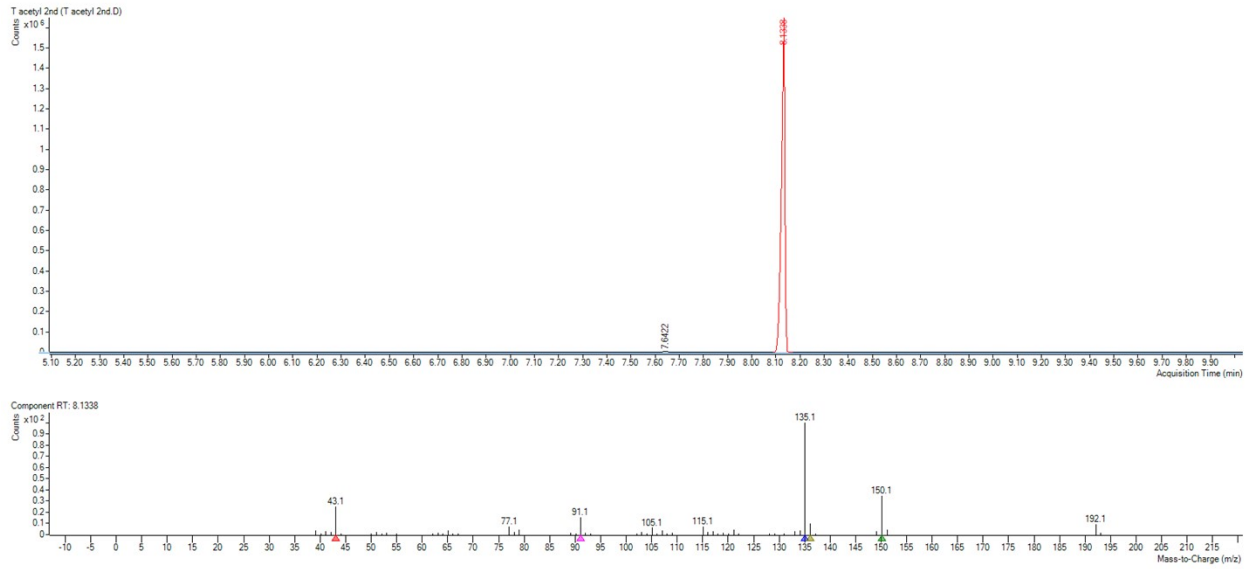

**Figure S15.** GCMS analysis of acetic acid 2-isopropyl-5-methyl-phenyl ester (TA).



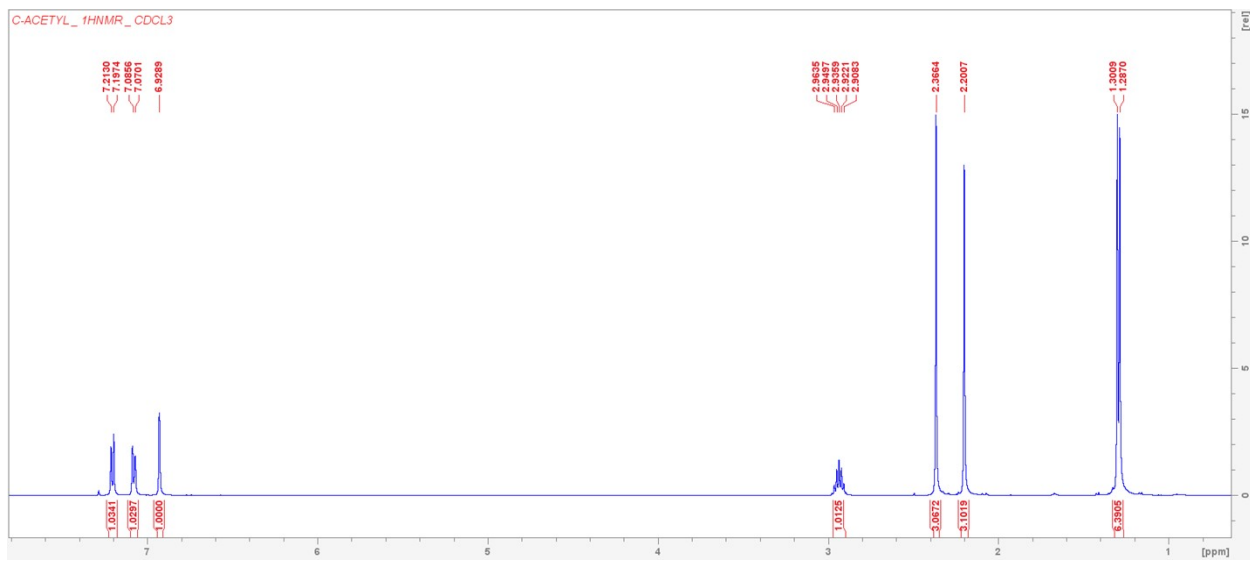

**Figure S16.** <sup>1</sup>H-NMR spectrum of acetic acid 3-isopropyl-6-methyl-phenyl ester (CA) in CDCl<sub>3</sub>.

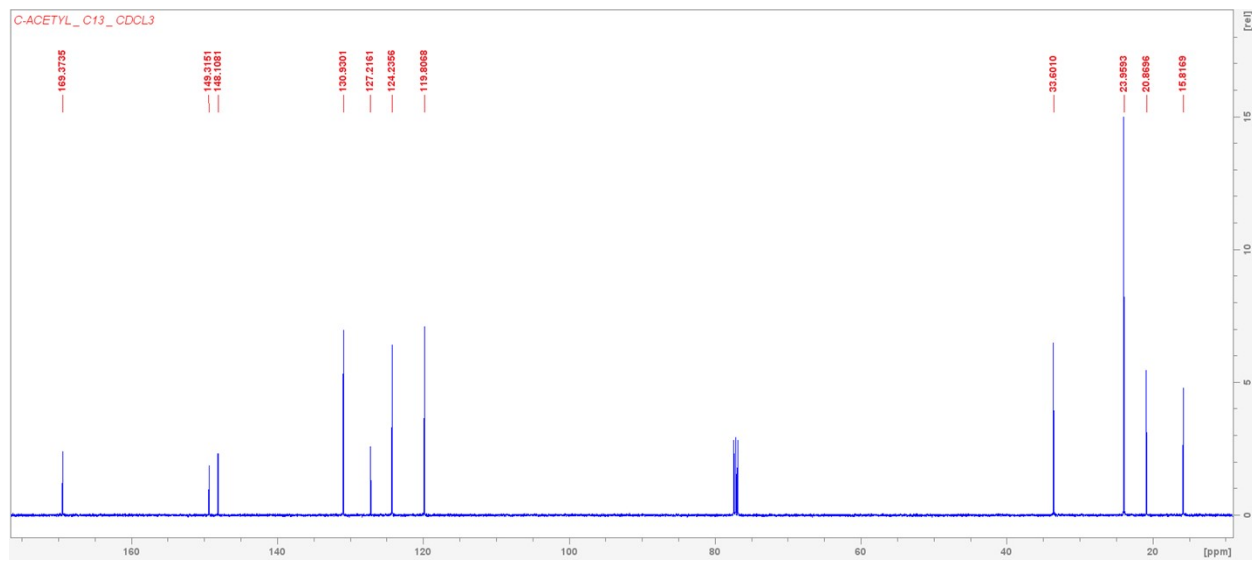

**Figure S17.**  $^{13}\text{C}$ -NMR spectrum of acetic acid 3-isopropyl-6-methyl-phenyl ester (CA) in  $\text{CDCl}_3$ .

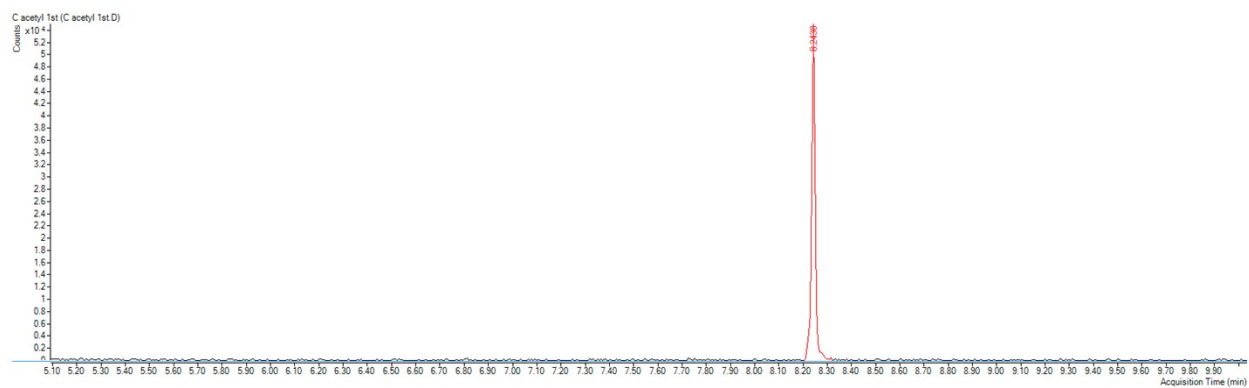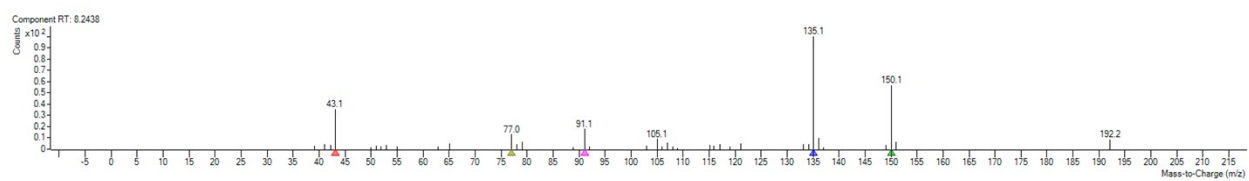

**Figure S18.** GCMS analysis of acetic acid 3-isopropyl-6-methyl-phenyl ester (CA).

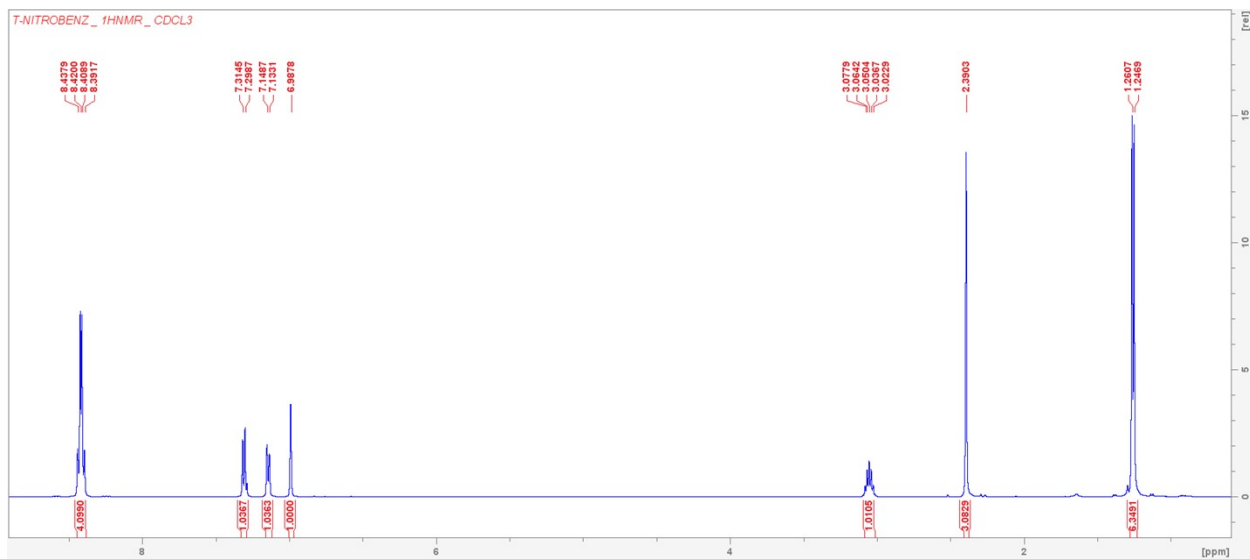

**Figure S19.**  $^1\text{H-NMR}$  spectrum of 4-nitro-benzoic acid 2-isopropyl-5-methyl-phenyl ester (TN) in  $\text{CDCl}_3$ .

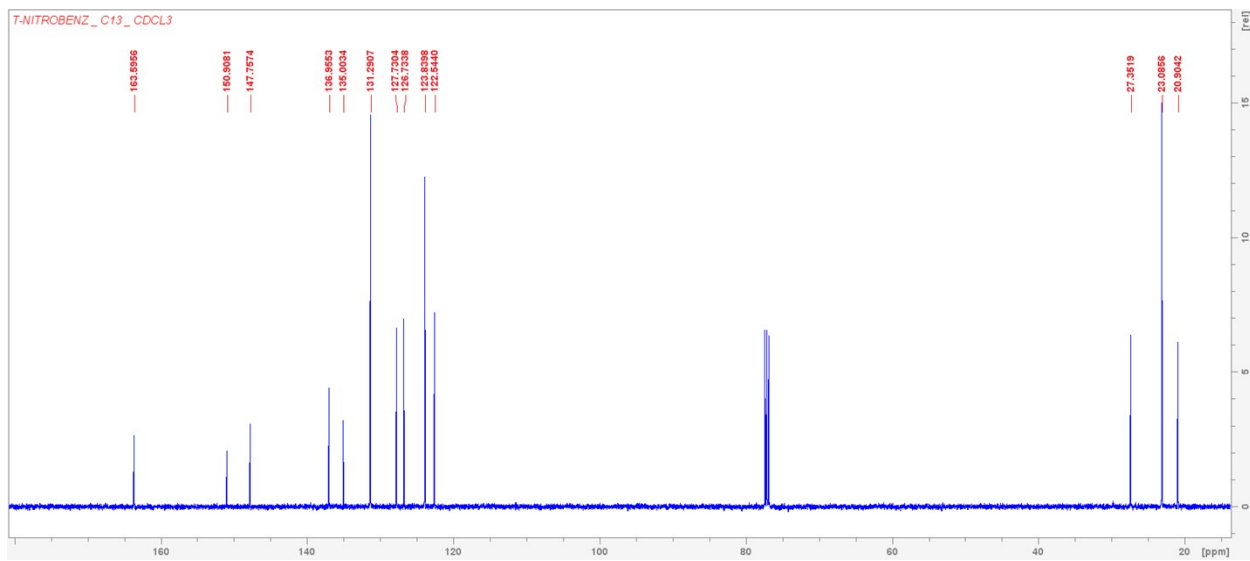

**Figure S20.** <sup>13</sup>C-NMR spectrum of 4-nitro-benzoic acid 2-isopropyl-5-methyl-phenyl ester (TN) in CDCl<sub>3</sub>.

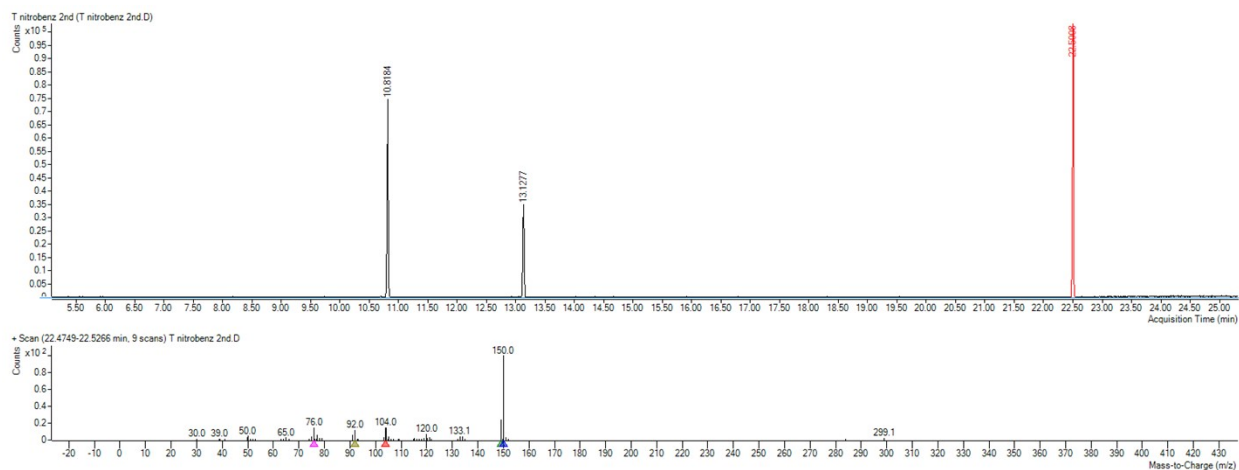

**Figure S21.** GCMS analysis of 4-nitro-benzoic acid 2-isopropyl-5-methyl-phenyl ester (TN). Fragmentation occurred possibly due to high temperature.

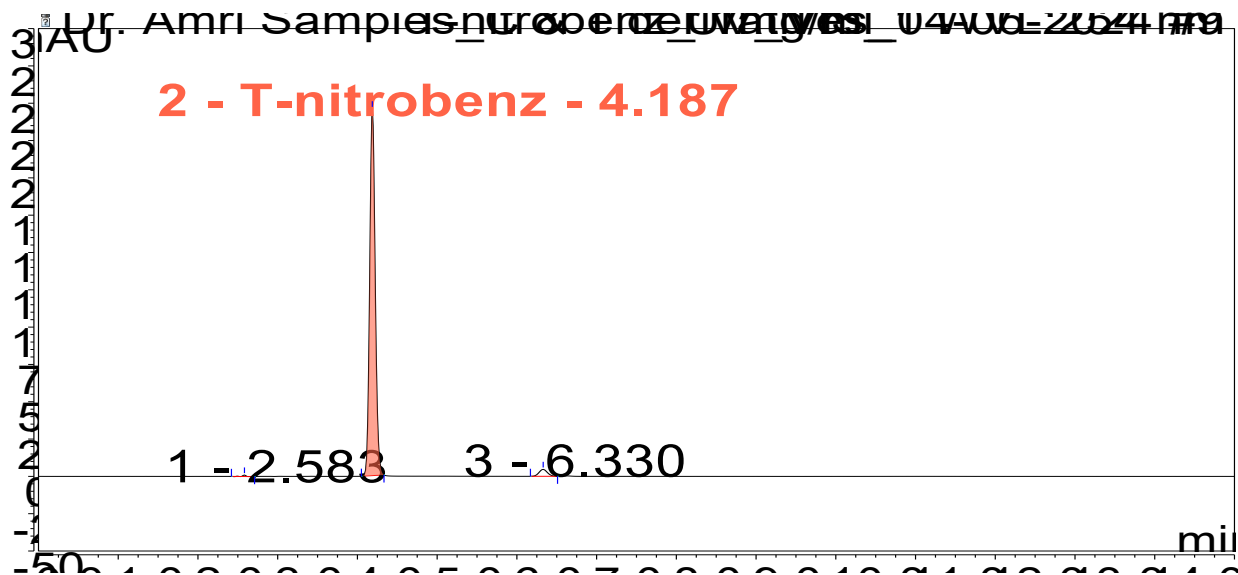

Figure S22. HPLC analysis of 4-nitro-benzoic acid 2-isopropyl-5-methyl-phenyl ester (TN).

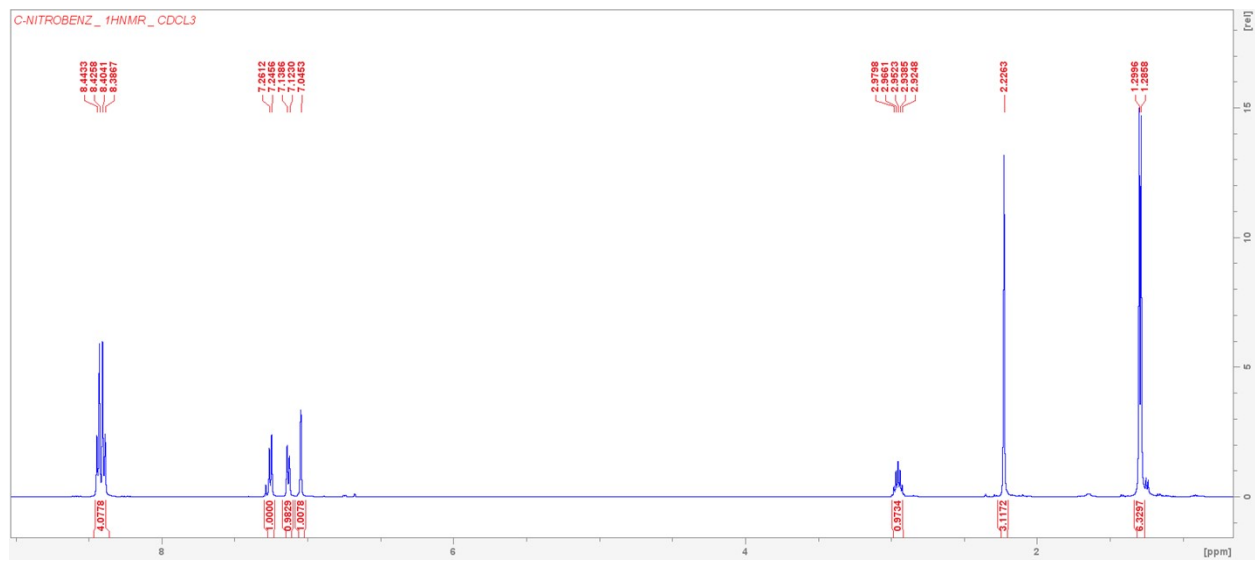

**Figure S23.** <sup>1</sup>H-NMR spectrum of 4-nitro-benzoic acid 3-isopropyl-6-methyl-phenyl ester (CN) in CDCl<sub>3</sub>.



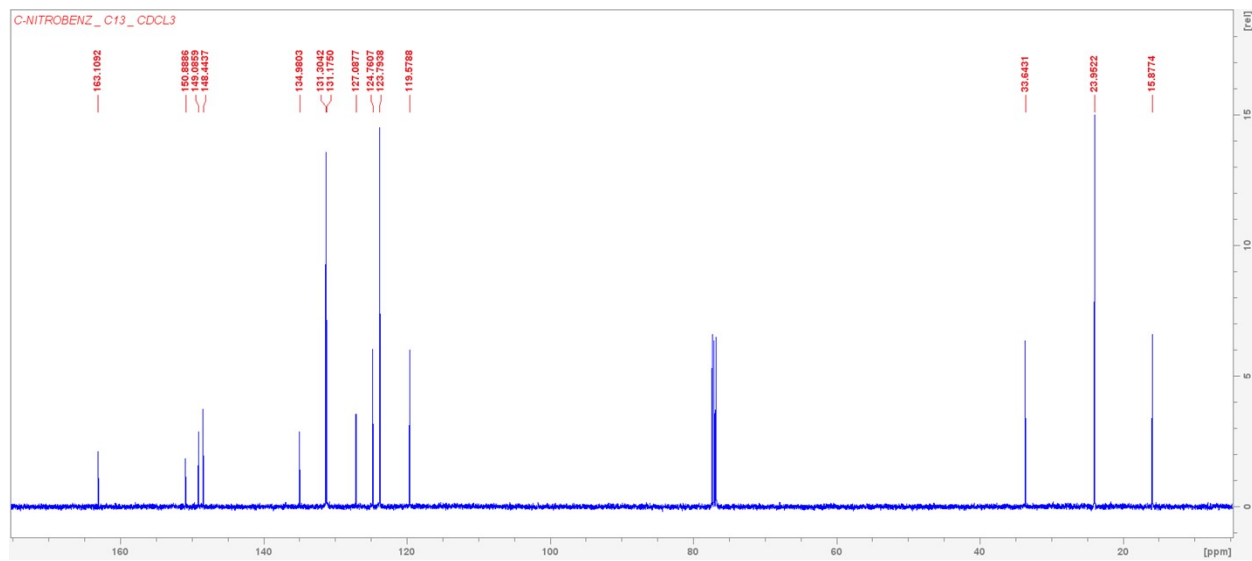

**Figure S24.**  $^{13}\text{C}$ -NMR spectrum of 4-nitro-benzoic acid 3-isopropyl-6-methyl-phenyl ester (CN) in  $\text{CDCl}_3$ .

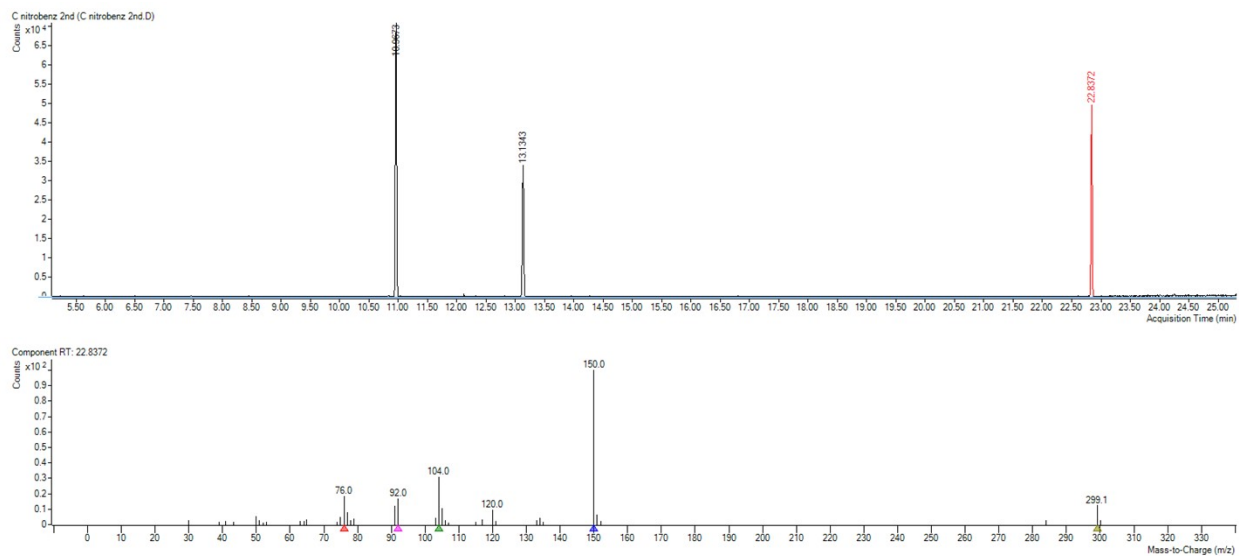

**Figure S25.** GCMS analysis of 4-nitro-benzoic acid 3-isopropyl-6-methyl-phenyl ester (CN). Fragmentation occurred possibly due to high temperature.

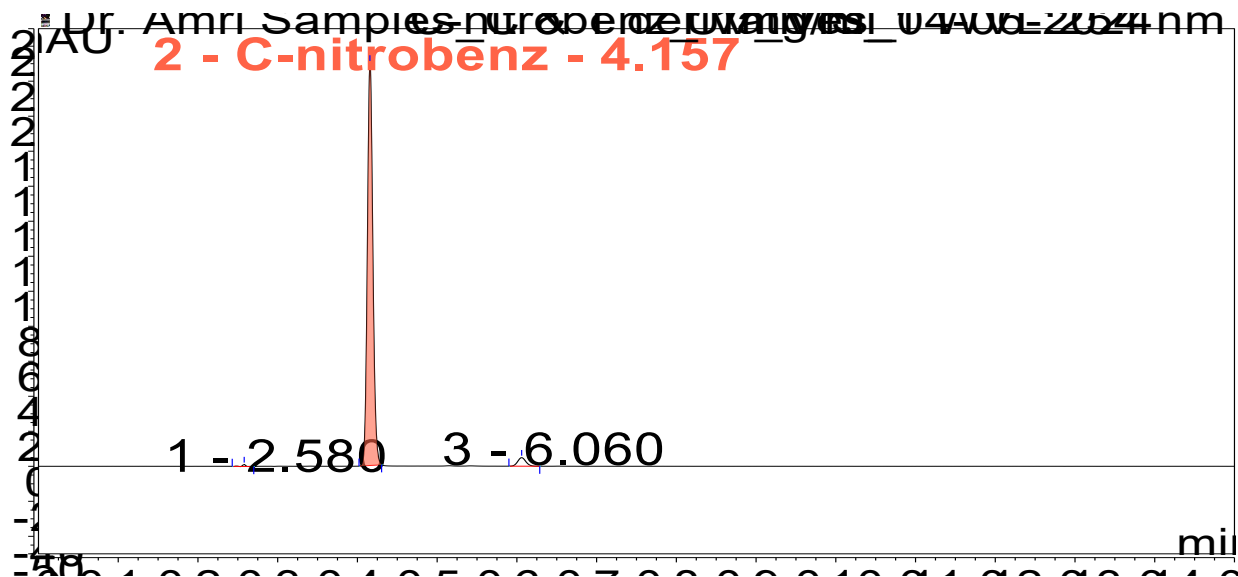

Figure S26. HPLC analysis of 4-nitro-benzoic acid 3-isopropyl-6-methyl-phenyl ester (CN).

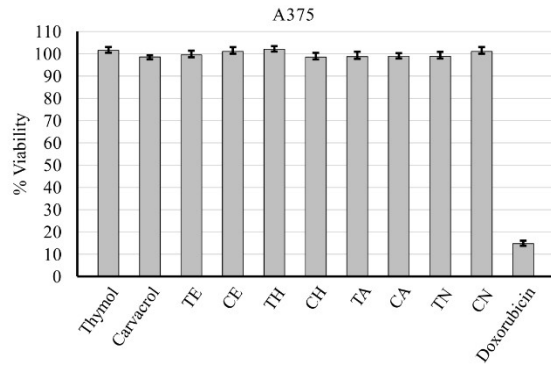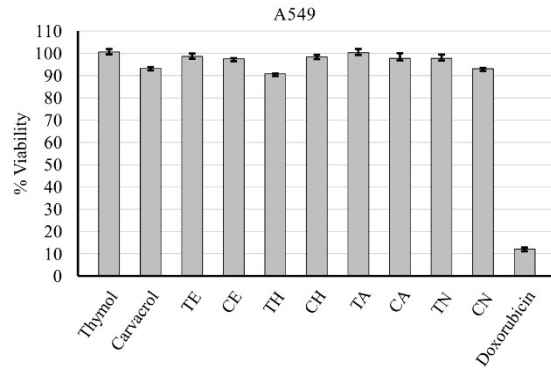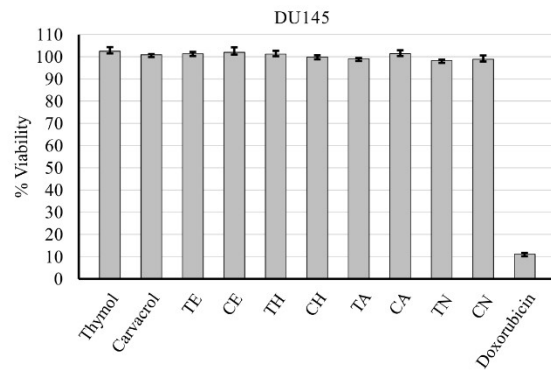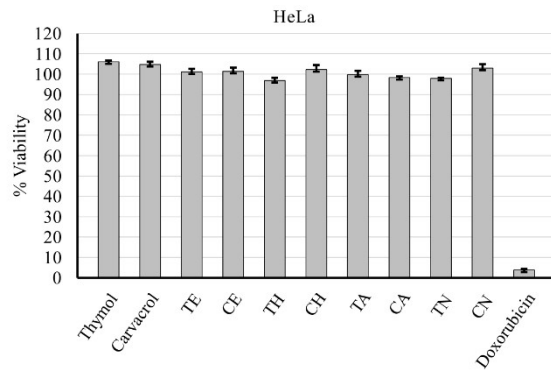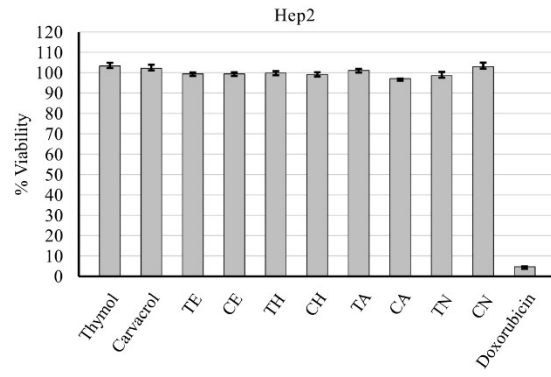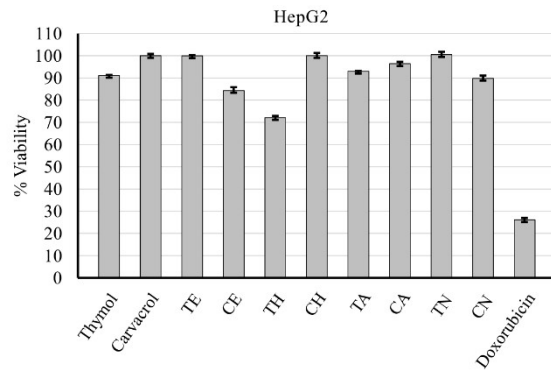

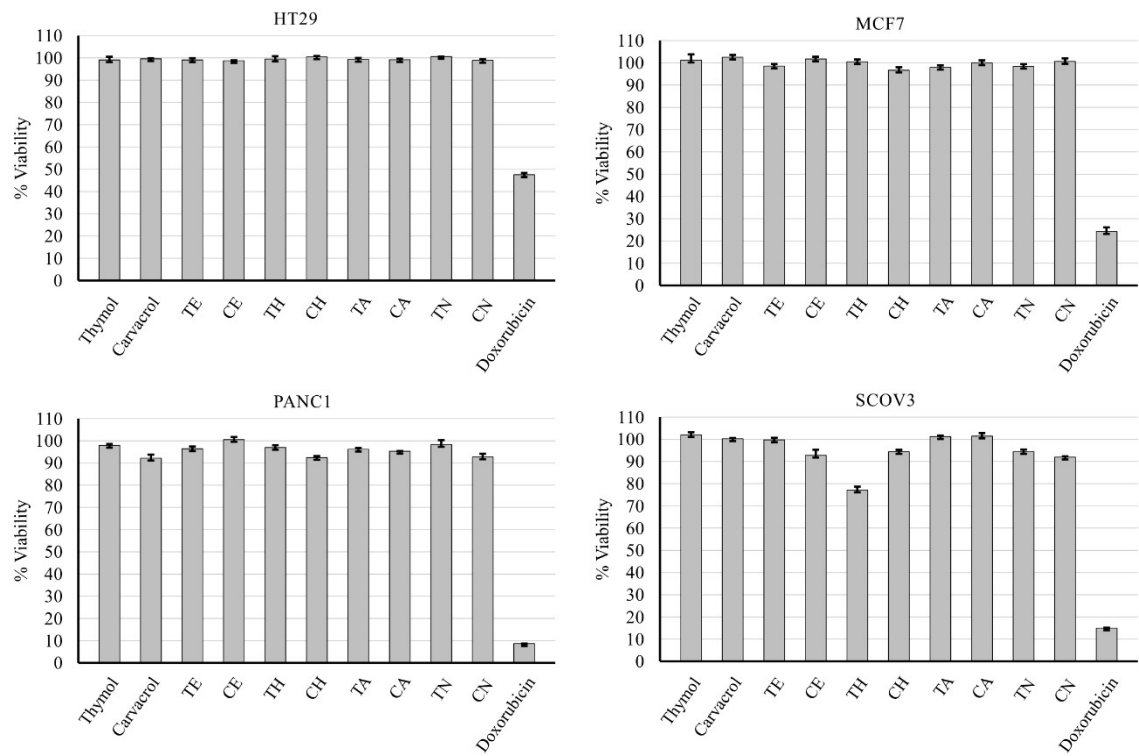

**Figure S27.** In vitro anticancer activity at 10  $\mu$ M.

Compound genes overlapping with top 25k cancer genes

| Thymol  | Carvacrol | TE      | CE      | TH      | CH      | TA      | CA     | TN       | CN      | All      | KCNMA1  |
|---------|-----------|---------|---------|---------|---------|---------|--------|----------|---------|----------|---------|
| DRD3    | ALB       | UTS2R   | TNKS2   | PTPN1   | PTPN1   | TNKS2   | EGFR   | CDC25B   | MMP2    | JAK2     | KCNMA1  |
| ALB     | SLC6A2    | BRD3    | TNKS    | CTSK    | TNKS    | ALDH2   | ALDH2  | GSTP1    | CDC25B  | CASP1    | NO52    |
| HTR2B   | ACHE      | CLK2    | ALDH2   | GRM1    | ALDH2   | CTSB    | CTSB   | ACR      | GSTP1   | CASN1    | ELANE   |
| NOS3    | HTR2A     | MAPK14  | HOAC1   | EPHX1   | CSAR1   | UTS2R   | UTS2R  | ACR      | EPHX2   | CACNA1C  | BRD4    |
| TRPA1   | TRPA1     | CTSK    | BRD3    | VCP     | EPHX1   | KCN33   | KCN33  | MALT1    | MBO2    | SELE     | CLK3    |
| HDAC8   | SLC6A4    | CTSK    | BRD3    | CRHR1   | VCP     | HSD17B3 | ABCC1  | MAP3K8   | NY5R    | CTSH     | GSK3B   |
| CA2     | CA2       | PK3CD   | CXCR2   | DUSP3   | EPHX2   | EPHX2   | EPHX2  | ADAMTSS  | SNCA    | FGFR1    | IDO1    |
| CHRM2   | CHRM2     | MGILL   | MAPK14  | CNRI    | CNRI    | CBFB    | EPHX1  | CYP22A19 | MBO2    | PRKDC    | CXCR1   |
| PRKCA   | PRKCA     | BCHE    | PDE10A  | TTR     | TTR     | EPHX1   | PDE10A | PDE4D    | ACR     | CHRM2    | CDK2    |
| CYP19A1 | TYR       | PDE10A  | CTSK    | PSMB5   | PSMB5   | PDE10A  | TRPM8  | MAPK1    | HMOX1   | HMOX1    | GABRA5  |
| DRD5    | HTR2C     | MPO     | MGILL   | TLR9    | ACT1    | TRPM8   | QPCT   | HSD17B3  | IRAK4   | IRAK4    | FLT4    |
| JAK1    | JAK1      | GABRA6  | CYP19A1 | ACT1    | MC4R    | CYP11B2 | MAPK8  | MAPK8    | PGR     | IRAK4    | CHRNA7  |
| JAK1    | CHRM1     | CLK1    | PDE10A  | MC4R    | ROBA    | GPIR    | HMOX1  | PDE4B    | ALB     | RPS6KB1  | CDCA25A |
| AR      | CHRM1     | PIK3CG  | MPO     | ROBA    | SLCSA1  | PIK3CG  | KCN22  | EPHX2    | CASP4   | MAPKAPK2 | HRH4    |
| PTGS1   | JAK2      | SYK     | GABRA6  | CNRI    | CNRI    | EPHX1   | FAAH   | EPHX1    | BRD3    | C5AR1    | LIPE    |
| CHRM1   | ESRRG     | TLR9    | CLK1    | SLCSA1  | ROBB    | GSK3A   | HTR6   | GSK3A    | SLC6A2  | ROCK2    | ILK     |
| JAK2    | FLT3      | PRKDC   | PRKDC   | CNRI    | AVPR2   | HMOX1   | PABPC1 | IRAK4    | MALT1   | BGHE     | TGFBRI  |
| NOS1    | CDK2      | PLA2G7  | PLA2G7  | ROBB    | PHLPP1  | KCN22   | EGLN3  | IRAK4    | AKR1B10 | PDE4A    | MAOB    |
| ESRRG   | AURKA     | CYP11B1 | CYP11B1 | AVPR2   | P2RX4   | TSP0    | CTSH   | MYC      | CLK2    | CYP17A1  | SRC     |
| HTR6    | SLC6A3    | TSP0    | KDR     | PHLPP1  | CCR5    | ADORA1  | PLA2G6 | MMP1     | MAP2    | NRIH3    | PK3CA   |
| HSD11B1 |           | CLK4    | TSP0    | ILK     | ILK     | ADORA1  | PLA2G6 | MMP1     | MAP2    | KDR      | PPME1   |
| FLT3    |           | CLK4    | TSP0    | ILK     | ILK     | ADORA1  | PLA2G6 | MMP1     | MAP2    | CXCR2    | PPME1   |
| HDAC6   |           | PIK3CB  | CLK4    | NRI12   | METAP1  | PIK3CB  | CTRBB1 | MMP3     | MAPK14  | ROBA     | KCN11   |
| IDO1    |           | KNMA5   | KNMA5   | RORC    | RORC    | FAAH    | TBXAS1 | DUSP3    | MAPK14  | TRPV1    | IGFIR   |
| AURKA   |           | HSD11B1 | HSD11B1 | SLCSA4  | SLCSA4  | CYP11B1 | KCNMA1 | CEP      | MAPK14  | TRPV1    | IGFIR   |
| CA4     |           | SCN9A   | GABRA1  | ALOX5   | KNNA4   | EPGN3   | GSK3B  | ROCK2    | MAPK14  | TRPV1    | IGFIR   |
| SLC6A3  |           | BRD2    | GABRA1  | KCNNA4  | KCNNA4  | HSD11B1 | HRH4   | TRPM8    | MAPK14  | TRPV1    | IGFIR   |
|         |           | BRD2    | BRD2    | ILK     | ILK     | CTSH    | LIPE   | TBXAS1   | MAPK14  | TRPV1    | IGFIR   |
|         |           | P2RX7   | P2RX7   | PLA2G6  | TGFBRI  | PLA2G6  | PDE4C  | DYSK2    | MAPK14  | TRPV1    | IGFIR   |
|         |           | NLRP3   | NLRP3   | IDH1    | KCN11   | PDE4C   | LRRK2  | TRPM8    | MAPK14  | TRPV1    | IGFIR   |
|         |           | CTSS    | TBXAS1  | TBXAS1  | F2      | AURKA   | LRRK2  | DYSK2    | MAPK14  | TRPV1    | IGFIR   |
|         |           | TBXAS1  | MAPK14  | KCNMA1  | KNNA4   | KNMA1   | PKG1   | CLK1     | CLK1    | CLK1     | F2      |
|         |           | RAPGEF4 | RAPGEF4 | ELANE   | ELANE   | ELANE   | ALOX5  | PIK3CG   | TRPA1   | PDGFRB   | METAP1  |
|         |           | CYS15   | CYS15   | GSK3B   | GSK3B   | HRH4    | ROCK1  | JAK1     | TRPA1   | PDGFRB   | METAP1  |
|         |           | HDAC6   | HDAC6   | HRH4    | HRH4    | HRH4    | ROCK1  | JAK1     | TRPA1   | PDGFRB   | METAP1  |
|         |           | CCR5    | NOS2    | LIPE    | LIPE    | LIPE    | VCAM1  | AKT1     | TRPA1   | PDGFRB   | METAP1  |
|         |           | NOS2    | BRD4    | BRD4    | BRD4    | BRD4    | ROCK1  | JAK1     | TRPA1   | PDGFRB   | METAP1  |
|         |           | GSK3B   | GSK3B   | CXCR1   | CXCR1   | CXCR1   | TRPC3  | PRKCZ    | TRPA1   | PDGFRB   | METAP1  |
|         |           | GABRA5  | GABRA5  | REL     | REL     | REL     | TRPC3  | PRKCZ    | TRPA1   | PDGFRB   | METAP1  |
|         |           | PIK3CA  | PIK3CA  | VCAM1   | VCAM1   | VCAM1   | TRPC3  | PRKCZ    | TRPA1   | PDGFRB   | METAP1  |
|         |           | SLC6A3  | SLC6A3  | VCAM1   | VCAM1   | VCAM1   | TRPC3  | PRKCZ    | TRPA1   | PDGFRB   | METAP1  |
|         |           | YS1     | YS1     | CASP1   | CASP1   | CASP1   | TRPC3  | PRKCZ    | TRPA1   | PDGFRB   | METAP1  |
|         |           | DTOR    | DTOR    | CACNA1C | CACNA1C | CACNA1C | TRPC3  | PRKCZ    | TRPA1   | PDGFRB   | METAP1  |
|         |           | DYSK1B  | DYSK1B  | PDE9A   | PDE9A   | PDE9A   | TRPC3  | PRKCZ    | TRPA1   | PDGFRB   | METAP1  |
|         |           | CTSL    | CTSL    | MPI     | MPI     | MPI     | TRPC3  | PRKCZ    | TRPA1   | PDGFRB   | METAP1  |
|         |           | FKBP1A  | FKBP1A  | SCN9A   | SCN9A   | SCN9A   | TRPC3  | PRKCZ    | TRPA1   | PDGFRB   | METAP1  |

Table S1. Gene targets of the test compounds.
